WINTER 2023 | VOLUME 35 | NUMBER 1

The Journal of  
**Neuropsychiatry**  
and Clinical Neurosciences

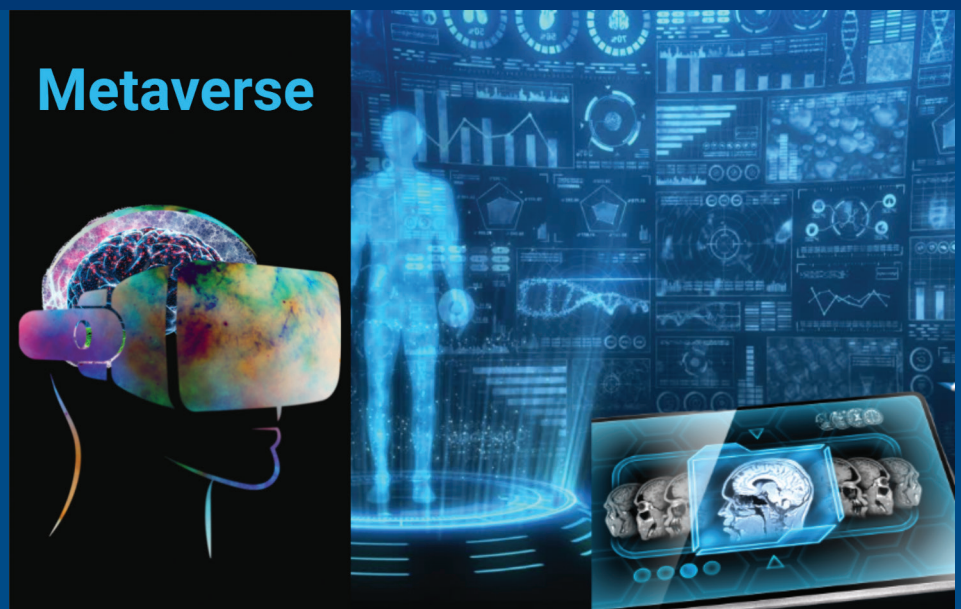

Consensus Clinical Guidance for Diagnosis and Management  
of Adult COVID-19 Encephalopathy Patients

Empirical and Authoritative Classification of Neuropsychiatric  
Syndromes in Neurocognitive Disorders

A Neuropsychiatric and Neuroimaging Study of Unilateral  
and Bilateral Striatal Ischemic Lesions

Apathy and Depression in Huntington's Disease: Distinct  
Longitudinal Trajectories and Clinical Correlates

Views on Using Psychoactive Substances to Self-Manage  
Functional Neurological Disorder: Online Patient Survey Results

Official Journal of the American Neuropsychiatric Association  
[neuro.psychiatryonline.org](http://neuro.psychiatryonline.org)
